# Supplementary material for: The Landscape of Influential Factors on Fecal Calprotectin in Convalescing Preterm Infants (Corrected Age of 10-18 Months)
Source: Research Square preprint supplement (doi:10.21203/rs.3.rs-8459794/v1), 2026-01-09
Supplement: Supplementary file 1 [file ad819a59d2586254343aca4c.docx]

**Appendix A**

**Table A1.** A comparison of the number of subjects with different timings of formula introduction for full-term infants and PTI.

|  | **Full-term infants** | **PTI** |
| --- | --- | --- |
| ≤ 6 months | 41 | 98 |
| ＞6 months | 10 | 11 |

**Table A2.** The varying impacts of the timing of formula introduction on the FC for full-term infants and PTIs. (P＜0.05*).

| **P value** | **Full-term infants** | **PTIs** |
| --- | --- | --- |
| FC content | 0.054a | 0.022*a |
| FC grade | 0.054b | 0.114b |

*P＜0.05*.

a Mann-Whitney U test.

b Fisher’s exact tests.
